# Supplementary material
Source: publisher figshare collection journal article supplement (https://acs.figshare.com/ndownloader/files/4757323)
Supplement: Supplementary file 1 [file 4757323]

  
data_ic11469 
  
_audit_creation_method            SHELXL-97 
_chemical_name_systematic 
; 
 ? 
; 
_chemical_name_common             ? 
_chemical_melting_point           ? 
_chemical_formula_moiety          ? 
_chemical_formula_sum 
 'C94 H70 Cl8' 
_chemical_formula_weight          1483.10 
  
loop_ 
 _atom_type_symbol 
 _atom_type_description 
 _atom_type_scat_dispersion_real 
 _atom_type_scat_dispersion_imag 
 _atom_type_scat_source 
 'C'  'C'   0.0033   0.0016 
 'International Tables Vol C Tables 4.2.6.8 and 6.1.1.4' 
 'H'  'H'   0.0000   0.0000 
 'International Tables Vol C Tables 4.2.6.8 and 6.1.1.4' 
 'Cl'  'Cl'   0.1484   0.1585 
 'International Tables Vol C Tables 4.2.6.8 and 6.1.1.4' 
  
_symmetry_cell_setting            Triclinic 
_symmetry_space_group_name_H-M    P-1 
  
loop_ 
 _symmetry_equiv_pos_as_xyz 
 'x, y, z' 
 '-x, -y, -z' 
  
_cell_length_a                    10.4953(2) 
_cell_length_b                    12.5604(2) 
_cell_length_c                    18.7166(3) 
_cell_angle_alpha                 93.5940(10) 
_cell_angle_beta                  102.2000(10) 
_cell_angle_gamma                 106.1210(10) 
_cell_volume                      2297.33(7) 
_cell_formula_units_Z             1 
_cell_measurement_temperature     295(2) 
_cell_measurement_reflns_used     54070 
_cell_measurement_theta_min       1 
_cell_measurement_theta_max       27.5 
  
_exptl_crystal_description        ? 
_exptl_crystal_colour             ? 
_exptl_crystal_size_max           0.25 
_exptl_crystal_size_mid           0.20 
_exptl_crystal_size_min           0.15 
_exptl_crystal_density_meas       ? 
_exptl_crystal_density_diffrn     1.072 
_exptl_crystal_density_method     'not measured' 
_exptl_crystal_F_000              770 
_exptl_absorpt_coefficient_mu     0.285 
_exptl_absorpt_correction_type    multi-scan 
_exptl_absorpt_correction_T_min   0.914 
_exptl_absorpt_correction_T_max   0.959 
_exptl_absorpt_process_details 
; 
multi-scan from symmetry-related measurements 
 Sortav (Blessing 1995) 
; 
  
_exptl_special_details 
; 
 ? 
; 
  
_diffrn_ambient_temperature       295(2) 
_diffrn_radiation_wavelength      0.71073 
_diffrn_radiation_type            MoK\a 
_diffrn_radiation_source          'fine-focus sealed tube' 
_diffrn_radiation_monochromator   graphite 
_diffrn_measurement_device_type   'Nonius KappaCCD' 
_diffrn_measurement_method        CCD 
_diffrn_detector_area_resol_mean  ? 
_diffrn_standards_number          ? 
_diffrn_standards_interval_count  ? 
_diffrn_standards_interval_time   ? 
_diffrn_standards_decay_%         ? 
_diffrn_reflns_number             12733 
_diffrn_reflns_av_R_equivalents   0.0227 
_diffrn_reflns_av_sigmaI/netI     0.0406 
_diffrn_reflns_limit_h_min        -12 
_diffrn_reflns_limit_h_max        12 
_diffrn_reflns_limit_k_min        -14 
_diffrn_reflns_limit_k_max        14 
_diffrn_reflns_limit_l_min        -22 
_diffrn_reflns_limit_l_max        22 
_diffrn_reflns_theta_min          1.70 
_diffrn_reflns_theta_max          25.00 
_reflns_number_total              8036 
_reflns_number_gt                 5337 
_reflns_threshold_expression      >2sigma(I) 
  
_computing_data_collection        'COLLECT (Nonius BV)' 
_computing_cell_refinement        'HKL Denzo & Scalepack (Otwinowski & Minor)' 
_computing_data_reduction         'HKL Denzo & Scalepack (Otwinowski & Minor)' 
_computing_structure_solution     'SHELXS-97 (Sheldrick, 1990)' 
_computing_structure_refinement   'SHELXL-97 (Sheldrick, 1997)' 
_computing_molecular_graphics     SHELXTL 
_computing_publication_material   SHELXTL 
  
_refine_special_details 
; 
 Refinement of F^2^ against ALL reflections.  The weighted R-factor wR and 
 goodness of fit S are based on F^2^, conventional R-factors R are based 
 on F, with F set to zero for negative F^2^. The threshold expression of 
 F^2^ > 2sigma(F^2^) is used only for calculating R-factors(gt) etc. and is 
 not relevant to the choice of reflections for refinement.  R-factors based 
 on F^2^ are statistically about twice as large as those based on F, and R- 
 factors based on ALL data will be even larger. 
; 
  
_refine_ls_structure_factor_coef  Fsqd 
_refine_ls_matrix_type            full 
_refine_ls_weighting_scheme       calc 
_refine_ls_weighting_details 
; calc 
 [0.00000+1.00000exp(6.00(sin\q/\l)^2^)]/ 
   [\s^2^(Fo^2^)+0.0000+2.0000*P+(0.1400P)^2^+0.0000sin\q/\l] 
 where P = 0.33333Fo^2^ + 0.66667Fc^2^ 
; 
_atom_sites_solution_primary      direct 
_atom_sites_solution_secondary    difmap 
_atom_sites_solution_hydrogens    geom 
_refine_ls_hydrogen_treatment     constr 
_refine_ls_extinction_method      SHELXL 
_refine_ls_extinction_coef        0.130(18) 
_refine_ls_extinction_expression 
 'Fc^*^=kFc[1+0.001xFc^2^\l^3^/sin(2\q)]^-1/4^' 
_refine_ls_number_reflns          8036 
_refine_ls_number_parameters      551 
_refine_ls_number_restraints      1 
_refine_ls_R_factor_all           0.1719 
_refine_ls_R_factor_gt            0.1390 
_refine_ls_wR_factor_ref          0.3486 
_refine_ls_wR_factor_gt           0.3195 
_refine_ls_goodness_of_fit_ref    2.083 
_refine_ls_restrained_S_all       2.085 
_refine_ls_shift/su_max           0.059 
_refine_ls_shift/su_mean          0.002 
  
loop_ 
 _atom_site_label 
 _atom_site_type_symbol 
 _atom_site_fract_x 
 _atom_site_fract_y 
 _atom_site_fract_z 
 _atom_site_U_iso_or_equiv 
 _atom_site_adp_type 
 _atom_site_occupancy 
 _atom_site_symmetry_multiplicity 
 _atom_site_calc_flag 
 _atom_site_refinement_flags 
 _atom_site_disorder_assembly 
 _atom_site_disorder_group 
C1 C 0.6154(3) 0.5644(3) 0.05488(18) 0.0435(7) Uani 1 1 d . . . 
H1A H 0.6911 0.6066 0.0911 0.052 Uiso 1 1 calc R . . 
C2 C 0.5289(3) 0.4656(3) 0.06818(18) 0.0413(7) Uani 1 1 d . . . 
C3 C 0.4152(3) 0.4022(3) 0.01408(18) 0.0424(7) Uani 1 1 d . . . 
C4 C 0.3357(3) 0.2985(3) 0.04277(18) 0.0438(7) Uani 1 1 d . . . 
C5 C 0.4249(3) 0.3126(3) 0.12157(18) 0.0433(7) Uani 1 1 d . . . 
C6 C 0.4095(4) 0.2425(3) 0.17520(19) 0.0473(8) Uani 1 1 d . . . 
H6A H 0.3357 0.1781 0.1671 0.057 Uiso 1 1 calc R . . 
C7 C 0.5079(3) 0.2713(3) 0.24178(19) 0.0461(8) Uani 1 1 d . . . 
C8 C 0.6182(4) 0.3687(3) 0.25458(19) 0.0481(8) Uani 1 1 d . . . 
C9 C 0.6339(3) 0.4391(3) 0.20132(19) 0.0472(8) Uani 1 1 d . . . 
H9A H 0.7072 0.5039 0.2098 0.057 Uiso 1 1 calc R . . 
C10 C 0.3313(4) 0.1887(3) 0.00075(19) 0.0495(8) Uani 1 1 d . . . 
C11 C 0.4209(4) 0.1842(4) -0.0434(2) 0.0594(9) Uani 1 1 d . . . 
H11A H 0.4821 0.2502 -0.0500 0.071 Uiso 1 1 calc R . . 
C12 C 0.4210(6) 0.0830(4) -0.0779(3) 0.0739(12) Uani 1 1 d . . . 
H12A H 0.4827 0.0824 -0.1069 0.089 Uiso 1 1 calc R . . 
C13 C 0.3316(6) -0.0166(4) -0.0700(3) 0.0774(14) Uani 1 1 d . . . 
C14 C 0.2422(6) -0.0124(4) -0.0260(3) 0.0767(13) Uani 1 1 d . . . 
H14A H 0.1811 -0.0784 -0.0195 0.092 Uiso 1 1 calc R . . 
C15 C 0.2415(5) 0.0879(4) 0.0084(3) 0.0654(11) Uani 1 1 d . . . 
H15A H 0.1796 0.0880 0.0374 0.078 Uiso 1 1 calc R . . 
C16 C 0.1926(3) 0.3093(3) 0.0400(2) 0.0484(8) Uani 1 1 d . . . 
C17 C 0.0906(4) 0.2736(4) -0.0246(3) 0.0641(10) Uani 1 1 d . . . 
H17A H 0.1056 0.2338 -0.0640 0.077 Uiso 1 1 calc R . . 
C18 C -0.0335(5) 0.2962(5) -0.0314(3) 0.0806(15) Uani 1 1 d . . . 
H18A H -0.1002 0.2712 -0.0752 0.097 Uiso 1 1 calc R . . 
C19 C -0.0592(5) 0.3553(5) 0.0260(3) 0.0775(14) Uani 1 1 d . . . 
C20 C 0.0398(5) 0.3881(5) 0.0904(3) 0.0786(14) Uani 1 1 d . . . 
H20A H 0.0236 0.4263 0.1301 0.094 Uiso 1 1 calc R . . 
C21 C 0.1646(5) 0.3657(4) 0.0978(3) 0.0636(10) Uani 1 1 d . . . 
H21A H 0.2299 0.3890 0.1422 0.076 Uiso 1 1 calc R . . 
C22 C 0.3307(10) -0.1255(5) -0.1099(4) 0.114(3) Uani 1 1 d . . . 
H22A H 0.2641 -0.1864 -0.0975 0.171 Uiso 1 1 calc R . . 
H22B H 0.4194 -0.1359 -0.0955 0.171 Uiso 1 1 calc R . . 
H22C H 0.3081 -0.1234 -0.1622 0.171 Uiso 1 1 calc R . . 
C23 C -0.1924(6) 0.3841(7) 0.0177(5) 0.116(3) Uani 1 1 d . . . 
H23A H -0.1916 0.4260 0.0626 0.174 Uiso 1 1 calc R . . 
H23B H -0.2674 0.3166 0.0073 0.174 Uiso 1 1 calc R . . 
H23C H -0.2023 0.4281 -0.0221 0.174 Uiso 1 1 calc R . . 
C24 C 0.7112(4) 0.3822(3) 0.33219(19) 0.0537(9) Uani 1 1 d . . . 
C25 C 0.6346(4) 0.2763(4) 0.3607(2) 0.0568(9) Uani 1 1 d . . . 
C26 C 0.5199(4) 0.2134(3) 0.3071(2) 0.0533(9) Uani 1 1 d . . . 
C27 C 0.4381(5) 0.1124(4) 0.3204(3) 0.0667(11) Uani 1 1 d . . . 
H27A H 0.3611 0.0706 0.2848 0.080 Uiso 1 1 calc R . . 
C28 C 0.4740(6) 0.0755(5) 0.3879(3) 0.0821(14) Uani 1 1 d . . . 
H28A H 0.4204 0.0082 0.3978 0.099 Uiso 1 1 calc R . . 
C29 C 0.5875(7) 0.1370(5) 0.4402(3) 0.0868(15) Uani 1 1 d . . . 
H29A H 0.6103 0.1104 0.4850 0.104 Uiso 1 1 calc R . . 
C30 C 0.6688(6) 0.2381(5) 0.4276(3) 0.0756(13) Uani 1 1 d . . . 
H30A H 0.7451 0.2797 0.4637 0.091 Uiso 1 1 calc R . . 
C31 C 0.7144(4) 0.4911(4) 0.3741(2) 0.0570(9) Uani 1 1 d . . . 
C32 C 0.6159(5) 0.4966(4) 0.4118(2) 0.0660(11) Uani 1 1 d . . . 
H32A H 0.5520 0.4309 0.4166 0.079 Uiso 1 1 calc R . . 
C33 C 0.6103(6) 0.5978(5) 0.4427(3) 0.0792(13) Uani 1 1 d . . . 
H33A H 0.5417 0.5984 0.4670 0.095 Uiso 1 1 calc R . . 
C34 C 0.7032(7) 0.6975(5) 0.4386(3) 0.0852(15) Uani 1 1 d . . . 
C35 C 0.8039(8) 0.6927(5) 0.4028(3) 0.0897(16) Uani 1 1 d . . . 
H35A H 0.8695 0.7585 0.4000 0.108 Uiso 1 1 calc R . . 
C36 C 0.8100(6) 0.5913(4) 0.3706(3) 0.0742(12) Uani 1 1 d . . . 
H36A H 0.8789 0.5909 0.3466 0.089 Uiso 1 1 calc R . . 
C37 C 0.8546(4) 0.3748(3) 0.3315(2) 0.0548(9) Uani 1 1 d . . . 
C38 C 0.9566(5) 0.4021(5) 0.3963(3) 0.0771(13) Uani 1 1 d . . . 
H38A H 0.9396 0.4312 0.4391 0.093 Uiso 1 1 calc R . . 
C39 C 1.0825(5) 0.3870(6) 0.3986(3) 0.0880(16) Uani 1 1 d . . . 
H39A H 1.1483 0.4048 0.4429 0.106 Uiso 1 1 calc R . . 
C40 C 1.1124(5) 0.3458(5) 0.3361(3) 0.0770(13) Uani 1 1 d . . . 
C41 C 1.0119(5) 0.3205(4) 0.2719(3) 0.0696(11) Uani 1 1 d . . . 
H41A H 1.0297 0.2932 0.2289 0.084 Uiso 1 1 calc R . . 
C42 C 0.8859(4) 0.3344(4) 0.2695(2) 0.0578(9) Uani 1 1 d . . . 
H42A H 0.8204 0.3162 0.2250 0.069 Uiso 1 1 calc R . . 
C43 C 0.6975(12) 0.8076(7) 0.4724(5) 0.134(3) Uani 1 1 d . . . 
H43A H 0.7707 0.8670 0.4638 0.201 Uiso 1 1 calc R . . 
H43B H 0.7065 0.8071 0.5245 0.201 Uiso 1 1 calc R . . 
H43C H 0.6117 0.8188 0.4504 0.201 Uiso 1 1 calc R . . 
C44 C 1.2512(7) 0.3314(8) 0.3386(5) 0.117(3) Uani 1 1 d . . . 
H44A H 1.2542 0.3031 0.2903 0.176 Uiso 1 1 calc R . . 
H44B H 1.2677 0.2797 0.3724 0.176 Uiso 1 1 calc R . . 
H44C H 1.3200 0.4023 0.3545 0.176 Uiso 1 1 calc R . . 
C45 C 0.5366(3) 0.4100(3) 0.13442(18) 0.0427(7) Uani 1 1 d . . . 
Cl1 Cl -0.0531(4) 0.0085(5) -0.1864(2) 0.1339(16) Uani 0.50 1 d P A 1 
Cl2 Cl 0.1660(6) 0.1910(3) -0.2292(2) 0.1427(19) Uani 0.50 1 d P A 1 
Cl3 Cl 0.2473(8) -0.0007(7) -0.3055(5) 0.188(3) Uani 0.50 1 d P A 1 
Cl4 Cl -0.0481(6) 0.0062(6) -0.3567(3) 0.182(3) Uani 0.50 1 d P A 1 
C46 C 0.1056(18) 0.0477(12) -0.2209(8) 0.118(5) Uani 0.50 1 d P A 1 
C47 C 0.075(3) -0.0246(13) -0.2824(14) 0.168(10) Uani 0.50 1 d P A 1 
Cl5 Cl -0.0696(8) 0.3480(7) -0.2363(4) 0.180(3) Uani 0.50 1 d P B 2 
Cl6 Cl -0.2706(9) 0.2972(7) -0.3740(3) 0.206(4) Uani 0.50 1 d P C 2 
Cl7 Cl -0.4127(13) 0.3743(9) -0.1983(7) 0.142(4) Uani 0.25 1 d P B 2 
Cl8 Cl -0.3459(12) 0.1899(9) -0.2203(7) 0.108(3) Uani 0.25 1 d P B 2 
C48 C -0.1329(14) 0.374(2) -0.2276(12) 0.095(10) Uani 0.25 1 d PD B 2 
C49 C -0.288(2) 0.336(2) -0.2243(13) 0.087(6) Uani 0.25 1 d PD B 2 
Cl7' Cl -0.4381(8) 0.3906(8) -0.2484(5) 0.110(2) Uani 0.25 1 d P D 3 
Cl8' Cl -0.3980(19) 0.1689(10) -0.2548(13) 0.179(9) Uani 0.25 1 d P D 3 
C48' C -0.234(3) 0.3619(13) -0.2872(9) 0.077(6) Uani 0.25 1 d P D 3 
C49' C -0.394(3) 0.303(2) -0.2786(13) 0.105(9) Uani 0.25 1 d P D 3 
  
loop_ 
 _atom_site_aniso_label 
 _atom_site_aniso_U_11 
 _atom_site_aniso_U_22 
 _atom_site_aniso_U_33 
 _atom_site_aniso_U_23 
 _atom_site_aniso_U_13 
 _atom_site_aniso_U_12 
C1 0.0393(15) 0.0480(17) 0.0413(16) 0.0074(13) 0.0070(12) 0.0118(13) 
C2 0.0370(15) 0.0469(17) 0.0416(16) 0.0064(13) 0.0090(12) 0.0153(13) 
C3 0.0400(16) 0.0464(17) 0.0434(17) 0.0094(13) 0.0112(13) 0.0151(13) 
C4 0.0411(16) 0.0463(17) 0.0433(17) 0.0101(13) 0.0084(13) 0.0121(13) 
C5 0.0411(16) 0.0464(17) 0.0443(17) 0.0071(13) 0.0121(13) 0.0143(13) 
C6 0.0453(17) 0.0483(17) 0.0475(18) 0.0114(14) 0.0117(14) 0.0110(14) 
C7 0.0447(17) 0.0502(18) 0.0470(18) 0.0119(14) 0.0138(14) 0.0166(14) 
C8 0.0453(17) 0.062(2) 0.0405(17) 0.0116(15) 0.0106(14) 0.0193(15) 
C9 0.0437(16) 0.0527(18) 0.0446(17) 0.0097(14) 0.0098(14) 0.0131(14) 
C10 0.0496(18) 0.0512(19) 0.0451(17) 0.0089(14) 0.0050(14) 0.0148(15) 
C11 0.058(2) 0.060(2) 0.060(2) 0.0042(17) 0.0146(17) 0.0177(17) 
C12 0.083(3) 0.078(3) 0.066(3) -0.002(2) 0.014(2) 0.036(2) 
C13 0.100(4) 0.058(3) 0.066(3) -0.004(2) -0.008(2) 0.034(2) 
C14 0.095(3) 0.047(2) 0.077(3) 0.008(2) 0.008(3) 0.014(2) 
C15 0.073(3) 0.052(2) 0.064(2) 0.0088(18) 0.013(2) 0.0076(18) 
C16 0.0419(17) 0.0497(18) 0.0548(19) 0.0163(15) 0.0142(14) 0.0119(14) 
C17 0.047(2) 0.078(3) 0.063(2) 0.013(2) 0.0073(17) 0.0154(18) 
C18 0.044(2) 0.102(4) 0.088(3) 0.036(3) 0.005(2) 0.013(2) 
C19 0.054(2) 0.093(3) 0.105(4) 0.051(3) 0.035(3) 0.033(2) 
C20 0.077(3) 0.098(3) 0.089(3) 0.036(3) 0.042(3) 0.050(3) 
C21 0.060(2) 0.080(3) 0.062(2) 0.017(2) 0.0220(19) 0.030(2) 
C22 0.169(7) 0.076(3) 0.092(4) -0.013(3) -0.008(4) 0.063(4) 
C23 0.069(3) 0.147(6) 0.169(7) 0.081(6) 0.055(4) 0.058(4) 
C24 0.056(2) 0.068(2) 0.0398(17) 0.0136(16) 0.0119(15) 0.0199(17) 
C25 0.062(2) 0.071(2) 0.0453(19) 0.0169(17) 0.0169(16) 0.0265(18) 
C26 0.058(2) 0.064(2) 0.0462(18) 0.0183(16) 0.0182(16) 0.0243(17) 
C27 0.073(3) 0.066(2) 0.062(2) 0.022(2) 0.018(2) 0.017(2) 
C28 0.101(4) 0.077(3) 0.072(3) 0.036(3) 0.029(3) 0.022(3) 
C29 0.109(4) 0.095(4) 0.060(3) 0.038(3) 0.019(3) 0.031(3) 
C30 0.085(3) 0.091(3) 0.051(2) 0.028(2) 0.011(2) 0.027(3) 
C31 0.058(2) 0.073(2) 0.0382(17) 0.0094(16) 0.0082(15) 0.0184(18) 
C32 0.064(2) 0.083(3) 0.053(2) 0.007(2) 0.0152(18) 0.024(2) 
C33 0.085(3) 0.101(4) 0.062(3) 0.009(2) 0.025(2) 0.041(3) 
C34 0.111(4) 0.088(3) 0.062(3) 0.001(2) 0.023(3) 0.037(3) 
C35 0.122(5) 0.069(3) 0.075(3) 0.006(2) 0.029(3) 0.019(3) 
C36 0.084(3) 0.075(3) 0.065(3) 0.007(2) 0.031(2) 0.016(2) 
C37 0.051(2) 0.064(2) 0.0474(19) 0.0131(16) 0.0070(15) 0.0165(17) 
C38 0.065(3) 0.114(4) 0.051(2) 0.011(2) 0.0034(19) 0.032(3) 
C39 0.062(3) 0.128(5) 0.070(3) 0.017(3) -0.002(2) 0.034(3) 
C40 0.055(2) 0.094(3) 0.087(3) 0.028(3) 0.017(2) 0.027(2) 
C41 0.069(3) 0.082(3) 0.070(3) 0.019(2) 0.026(2) 0.032(2) 
C42 0.058(2) 0.069(2) 0.0481(19) 0.0112(17) 0.0101(16) 0.0219(18) 
C43 0.201(10) 0.102(5) 0.112(6) -0.008(4) 0.046(6) 0.064(6) 
C44 0.068(3) 0.172(7) 0.127(6) 0.042(5) 0.023(3) 0.056(4) 
C45 0.0430(16) 0.0477(17) 0.0418(16) 0.0101(13) 0.0131(13) 0.0174(14) 
Cl1 0.0764(18) 0.201(5) 0.101(2) 0.021(3) 0.0146(16) 0.010(2) 
Cl2 0.206(5) 0.084(2) 0.085(2) 0.0046(16) -0.011(2) -0.006(2) 
Cl3 0.202(6) 0.236(7) 0.209(6) 0.104(6) 0.130(6) 0.119(6) 
Cl4 0.163(4) 0.184(5) 0.098(3) 0.003(3) -0.046(3) -0.050(4) 
C46 0.137(12) 0.083(8) 0.098(9) 0.031(7) -0.035(8) 0.017(7) 
C47 0.21(2) 0.067(8) 0.173(19) 0.045(10) -0.035(16) 0.007(10) 
Cl5 0.171(6) 0.205(7) 0.138(4) 0.055(4) 0.033(4) 0.008(5) 
Cl6 0.264(8) 0.226(7) 0.071(2) -0.012(3) 0.036(3) -0.007(6) 
Cl7 0.178(9) 0.123(6) 0.133(7) -0.045(6) 0.055(7) 0.054(6) 
Cl8 0.103(5) 0.070(6) 0.130(7) 0.019(5) 0.030(5) -0.008(4) 
C48 0.025(6) 0.14(2) 0.090(14) -0.090(15) 0.008(7) 0.012(9) 
C49 0.103(16) 0.083(13) 0.080(13) 0.025(11) 0.023(12) 0.030(12) 
Cl7' 0.100(4) 0.139(6) 0.103(5) 0.001(5) 0.013(4) 0.066(4) 
Cl8' 0.210(17) 0.052(4) 0.29(2) -0.014(9) 0.164(16) -0.003(8) 
C48' 0.17(2) 0.047(8) 0.049(9) 0.022(7) 0.066(12) 0.045(10) 
C49' 0.14(2) 0.091(16) 0.068(13) -0.033(12) -0.004(14) 0.034(15) 
  
_geom_special_details 
; 
 All esds (except the esd in the dihedral angle between two l.s. planes) 
 are estimated using the full covariance matrix.  The cell esds are taken 
 into account individually in the estimation of esds in distances, angles 
 and torsion angles; correlations between esds in cell parameters are only 
 used when they are defined by crystal symmetry.  An approximate (isotropic) 
 treatment of cell esds is used for estimating esds involving l.s. planes. 
; 
  
loop_ 
 _geom_bond_atom_site_label_1 
 _geom_bond_atom_site_label_2 
 _geom_bond_distance 
 _geom_bond_site_symmetry_2 
 _geom_bond_publ_flag 
C1 C3 1.383(5) 2_665 ? 
C1 C2 1.391(5) . ? 
C1 H1A 0.9300 . ? 
C2 C3 1.395(5) . ? 
C2 C45 1.459(5) . ? 
C3 C1 1.383(5) 2_665 ? 
C3 C4 1.534(4) . ? 
C4 C10 1.529(5) . ? 
C4 C16 1.536(5) . ? 
C4 C5 1.541(5) . ? 
C5 C6 1.381(5) . ? 
C5 C45 1.406(5) . ? 
C6 C7 1.394(5) . ? 
C6 H6A 0.9300 . ? 
C7 C8 1.398(5) . ? 
C7 C26 1.463(5) . ? 
C8 C9 1.379(5) . ? 
C8 C24 1.539(5) . ? 
C9 C45 1.393(5) . ? 
C9 H9A 0.9300 . ? 
C10 C11 1.386(6) . ? 
C10 C15 1.388(6) . ? 
C11 C12 1.390(6) . ? 
C11 H11A 0.9300 . ? 
C12 C13 1.377(8) . ? 
C12 H12A 0.9300 . ? 
C13 C14 1.382(9) . ? 
C13 C22 1.514(7) . ? 
C14 C15 1.381(7) . ? 
C14 H14A 0.9300 . ? 
C15 H15A 0.9300 . ? 
C16 C21 1.382(6) . ? 
C16 C17 1.388(6) . ? 
C17 C18 1.391(7) . ? 
C17 H17A 0.9300 . ? 
C18 C19 1.382(9) . ? 
C18 H18A 0.9300 . ? 
C19 C20 1.369(8) . ? 
C19 C23 1.518(7) . ? 
C20 C21 1.396(6) . ? 
C20 H20A 0.9300 . ? 
C21 H21A 0.9300 . ? 
C22 H22A 0.9600 . ? 
C22 H22B 0.9600 . ? 
C22 H22C 0.9600 . ? 
C23 H23A 0.9600 . ? 
C23 H23B 0.9600 . ? 
C23 H23C 0.9600 . ? 
C24 C31 1.522(6) . ? 
C24 C37 1.537(5) . ? 
C24 C25 1.542(6) . ? 
C25 C30 1.381(6) . ? 
C25 C26 1.394(6) . ? 
C26 C27 1.390(6) . ? 
C27 C28 1.388(7) . ? 
C27 H27A 0.9300 . ? 
C28 C29 1.369(9) . ? 
C28 H28A 0.9300 . ? 
C29 C30 1.385(8) . ? 
C29 H29A 0.9300 . ? 
C30 H30A 0.9300 . ? 
C31 C32 1.383(6) . ? 
C31 C36 1.390(7) . ? 
C32 C33 1.385(7) . ? 
C32 H32A 0.9300 . ? 
C33 C34 1.374(9) . ? 
C33 H33A 0.9300 . ? 
C34 C35 1.379(9) . ? 
C34 C43 1.506(9) . ? 
C35 C36 1.397(8) . ? 
C35 H35A 0.9300 . ? 
C36 H36A 0.9300 . ? 
C37 C42 1.376(6) . ? 
C37 C38 1.389(6) . ? 
C38 C39 1.379(7) . ? 
C38 H38A 0.9300 . ? 
C39 C40 1.379(9) . ? 
C39 H39A 0.9300 . ? 
C40 C41 1.374(7) . ? 
C40 C44 1.508(7) . ? 
C41 C42 1.373(6) . ? 
C41 H41A 0.9300 . ? 
C42 H42A 0.9300 . ? 
C43 H43A 0.9600 . ? 
C43 H43B 0.9600 . ? 
C43 H43C 0.9600 . ? 
C44 H44A 0.9600 . ? 
C44 H44B 0.9600 . ? 
C44 H44C 0.9600 . ? 
Cl1 C46 1.86(2) . ? 
Cl2 C46 1.763(14) . ? 
Cl3 C47 1.90(3) . ? 
Cl4 C47 1.83(2) . ? 
C46 C47 1.34(3) . ? 
Cl5 C48 0.857(16) . ? 
Cl7 C49 1.66(2) . ? 
Cl8 C49 1.77(3) . ? 
C48 C49 1.584(17) . ? 
Cl7' C49' 1.43(3) . ? 
Cl8' C49' 1.76(3) . ? 
C48' C49' 1.69(4) . ? 
  
loop_ 
 _geom_angle_atom_site_label_1 
 _geom_angle_atom_site_label_2 
 _geom_angle_atom_site_label_3 
 _geom_angle 
 _geom_angle_site_symmetry_1 
 _geom_angle_site_symmetry_3 
 _geom_angle_publ_flag 
C3 C1 C2 117.7(3) 2_665 . ? 
C3 C1 H1A 121.2 2_665 . ? 
C2 C1 H1A 121.2 . . ? 
C1 C2 C3 121.4(3) . . ? 
C1 C2 C45 129.7(3) . . ? 
C3 C2 C45 109.0(3) . . ? 
C1 C3 C2 120.9(3) 2_665 . ? 
C1 C3 C4 127.8(3) 2_665 . ? 
C2 C3 C4 111.2(3) . . ? 
C10 C4 C3 113.3(3) . . ? 
C10 C4 C16 112.5(3) . . ? 
C3 C4 C16 107.0(3) . . ? 
C10 C4 C5 109.4(3) . . ? 
C3 C4 C5 100.4(3) . . ? 
C16 C4 C5 113.8(3) . . ? 
C6 C5 C45 120.6(3) . . ? 
C6 C5 C4 128.7(3) . . ? 
C45 C5 C4 110.7(3) . . ? 
C5 C6 C7 118.0(3) . . ? 
C5 C6 H6A 121.0 . . ? 
C7 C6 H6A 121.0 . . ? 
C6 C7 C8 121.3(3) . . ? 
C6 C7 C26 130.2(3) . . ? 
C8 C7 C26 108.5(3) . . ? 
C9 C8 C7 121.0(3) . . ? 
C9 C8 C24 127.8(3) . . ? 
C7 C8 C24 111.3(3) . . ? 
C8 C9 C45 117.9(3) . . ? 
C8 C9 H9A 121.0 . . ? 
C45 C9 H9A 121.0 . . ? 
C11 C10 C15 117.1(4) . . ? 
C11 C10 C4 121.8(3) . . ? 
C15 C10 C4 121.0(3) . . ? 
C10 C11 C12 121.2(4) . . ? 
C10 C11 H11A 119.4 . . ? 
C12 C11 H11A 119.4 . . ? 
C13 C12 C11 121.4(5) . . ? 
C13 C12 H12A 119.3 . . ? 
C11 C12 H12A 119.3 . . ? 
C12 C13 C14 117.5(4) . . ? 
C12 C13 C22 120.4(6) . . ? 
C14 C13 C22 122.0(6) . . ? 
C15 C14 C13 121.4(5) . . ? 
C15 C14 H14A 119.3 . . ? 
C13 C14 H14A 119.3 . . ? 
C14 C15 C10 121.5(5) . . ? 
C14 C15 H15A 119.3 . . ? 
C10 C15 H15A 119.3 . . ? 
C21 C16 C17 117.4(4) . . ? 
C21 C16 C4 121.9(3) . . ? 
C17 C16 C4 120.3(3) . . ? 
C16 C17 C18 121.2(5) . . ? 
C16 C17 H17A 119.4 . . ? 
C18 C17 H17A 119.4 . . ? 
C19 C18 C17 121.0(5) . . ? 
C19 C18 H18A 119.5 . . ? 
C17 C18 H18A 119.5 . . ? 
C20 C19 C18 117.9(4) . . ? 
C20 C19 C23 120.9(6) . . ? 
C18 C19 C23 121.1(6) . . ? 
C19 C20 C21 121.4(5) . . ? 
C19 C20 H20A 119.3 . . ? 
C21 C20 H20A 119.3 . . ? 
C16 C21 C20 121.0(5) . . ? 
C16 C21 H21A 119.5 . . ? 
C20 C21 H21A 119.5 . . ? 
C13 C22 H22A 109.5 . . ? 
C13 C22 H22B 109.5 . . ? 
H22A C22 H22B 109.5 . . ? 
C13 C22 H22C 109.5 . . ? 
H22A C22 H22C 109.5 . . ? 
H22B C22 H22C 109.5 . . ? 
C19 C23 H23A 109.5 . . ? 
C19 C23 H23B 109.5 . . ? 
H23A C23 H23B 109.5 . . ? 
C19 C23 H23C 109.5 . . ? 
H23A C23 H23C 109.5 . . ? 
H23B C23 H23C 109.5 . . ? 
C31 C24 C37 112.7(3) . . ? 
C31 C24 C8 108.1(3) . . ? 
C37 C24 C8 113.4(3) . . ? 
C31 C24 C25 114.1(3) . . ? 
C37 C24 C25 107.9(3) . . ? 
C8 C24 C25 100.1(3) . . ? 
C30 C25 C26 120.1(4) . . ? 
C30 C25 C24 128.9(4) . . ? 
C26 C25 C24 111.0(3) . . ? 
C27 C26 C25 120.7(4) . . ? 
C27 C26 C7 130.2(4) . . ? 
C25 C26 C7 109.1(3) . . ? 
C28 C27 C26 118.4(5) . . ? 
C28 C27 H27A 120.8 . . ? 
C26 C27 H27A 120.8 . . ? 
C29 C28 C27 120.8(5) . . ? 
C29 C28 H28A 119.6 . . ? 
C27 C28 H28A 119.6 . . ? 
C28 C29 C30 121.1(4) . . ? 
C28 C29 H29A 119.4 . . ? 
C30 C29 H29A 119.4 . . ? 
C25 C30 C29 118.9(5) . . ? 
C25 C30 H30A 120.5 . . ? 
C29 C30 H30A 120.5 . . ? 
C32 C31 C36 117.0(4) . . ? 
C32 C31 C24 121.8(4) . . ? 
C36 C31 C24 121.0(4) . . ? 
C31 C32 C33 121.4(5) . . ? 
C31 C32 H32A 119.3 . . ? 
C33 C32 H32A 119.3 . . ? 
C34 C33 C32 121.9(5) . . ? 
C34 C33 H33A 119.0 . . ? 
C32 C33 H33A 119.0 . . ? 
C33 C34 C35 117.1(5) . . ? 
C33 C34 C43 122.0(6) . . ? 
C35 C34 C43 120.9(7) . . ? 
C34 C35 C36 121.6(6) . . ? 
C34 C35 H35A 119.2 . . ? 
C36 C35 H35A 119.2 . . ? 
C31 C36 C35 120.9(5) . . ? 
C31 C36 H36A 119.6 . . ? 
C35 C36 H36A 119.6 . . ? 
C42 C37 C38 117.1(4) . . ? 
C42 C37 C24 122.6(3) . . ? 
C38 C37 C24 120.1(4) . . ? 
C39 C38 C37 121.3(5) . . ? 
C39 C38 H38A 119.3 . . ? 
C37 C38 H38A 119.3 . . ? 
C38 C39 C40 121.1(5) . . ? 
C38 C39 H39A 119.5 . . ? 
C40 C39 H39A 119.5 . . ? 
C41 C40 C39 117.4(4) . . ? 
C41 C40 C44 121.8(6) . . ? 
C39 C40 C44 120.9(6) . . ? 
C42 C41 C40 121.8(4) . . ? 
C42 C41 H41A 119.1 . . ? 
C40 C41 H41A 119.1 . . ? 
C41 C42 C37 121.3(4) . . ? 
C41 C42 H42A 119.3 . . ? 
C37 C42 H42A 119.3 . . ? 
C34 C43 H43A 109.5 . . ? 
C34 C43 H43B 109.5 . . ? 
H43A C43 H43B 109.5 . . ? 
C34 C43 H43C 109.5 . . ? 
H43A C43 H43C 109.5 . . ? 
H43B C43 H43C 109.5 . . ? 
C40 C44 H44A 109.5 . . ? 
C40 C44 H44B 109.5 . . ? 
H44A C44 H44B 109.5 . . ? 
C40 C44 H44C 109.5 . . ? 
H44A C44 H44C 109.5 . . ? 
H44B C44 H44C 109.5 . . ? 
C9 C45 C5 121.3(3) . . ? 
C9 C45 C2 130.0(3) . . ? 
C5 C45 C2 108.7(3) . . ? 
C47 C46 Cl2 117.0(13) . . ? 
C47 C46 Cl1 103.6(15) . . ? 
Cl2 C46 Cl1 114.1(11) . . ? 
C46 C47 Cl4 111.8(16) . . ? 
C46 C47 Cl3 102.2(15) . . ? 
Cl4 C47 Cl3 111.2(14) . . ? 
Cl5 C48 C49 142(3) . . ? 
C48 C49 Cl7 145.5(18) . . ? 
C48 C49 Cl8 110.9(17) . . ? 
Cl7 C49 Cl8 100.0(12) . . ? 
Cl7' C49' C48' 107.1(18) . . ? 
Cl7' C49' Cl8' 133(2) . . ? 
C48' C49' Cl8' 105.4(18) . . ? 
  
_diffrn_measured_fraction_theta_max    0.993 
_diffrn_reflns_theta_full              25.00 
_diffrn_measured_fraction_theta_full   0.993 
_refine_diff_density_max    0.995 
_refine_diff_density_min   -0.410 
_refine_diff_density_rms    0.136 
